# Supplementary material
Source: publisher figshare collection journal article supplement (https://acs.figshare.com/ndownloader/files/31114436)
Supplement: Supplementary file 1 [file 31114436]

## Supporting Information

# Band Gap Engineering in $\beta$ -Ga<sub>2</sub>O<sub>3</sub> for High-Performance X-ray Detector

Zhiwei Li,<sup>⊥</sup> Jiawen Chen,<sup>⊥</sup> Huili Tang,<sup>⊥</sup> Zhichao Zhu,<sup>⊥</sup> Mu Gu,<sup>⊥</sup> Jun Xu,<sup>⊥</sup> Liang Chen,<sup>#</sup>

Xiaoping Ouyang,<sup>#</sup> and Bo Liu<sup>\*,⊥</sup>

<sup>⊥</sup>Shanghai Key Laboratory of Special Artificial Microstructure Materials and Technology, School of Physics Science and Engineering, Tongji University, Shanghai 200092, P. R. China

<sup>#</sup>Northwest Institute of Nuclear Technology, Xi'an 710024, P. R. China

\*E-mail: lbo@tongji.edu.cn

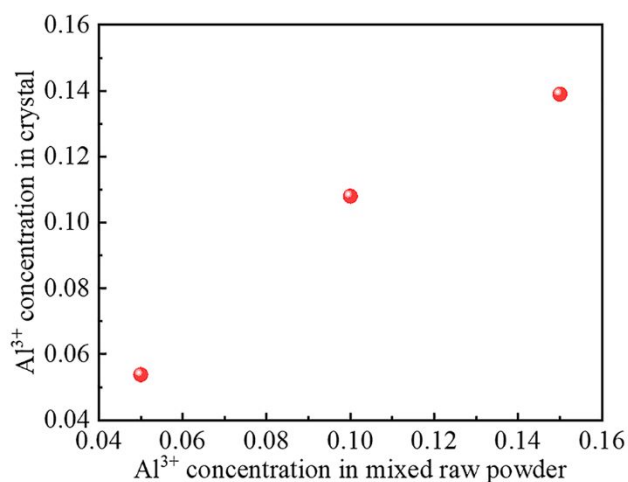

**Figure S1.** Al<sup>3+</sup> concentration in crystal vs Al<sup>3+</sup> concentration in mixed raw power.

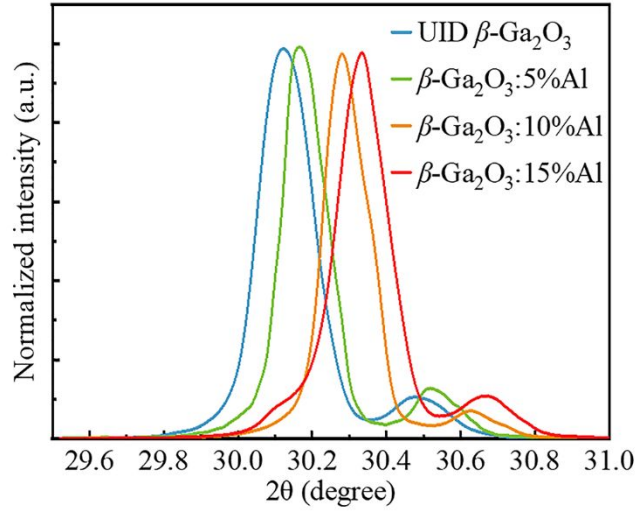

**Figure S2.** XRD patterns of (400) peak of UID  $\beta$ -Ga<sub>2</sub>O<sub>3</sub>,  $\beta$ -Ga<sub>2</sub>O<sub>3</sub>:5%Al,  $\beta$ -Ga<sub>2</sub>O<sub>3</sub>:10%Al and  $\beta$ -Ga<sub>2</sub>O<sub>3</sub>:15%Al single crystals.

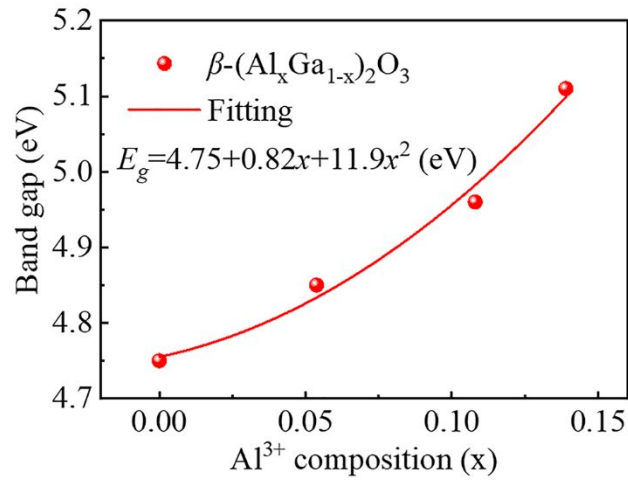

**Figure S3.** Dependence of band gap of  $\beta$ -Ga<sub>2</sub>O<sub>3</sub>:Al on Al<sup>3+</sup> composition.

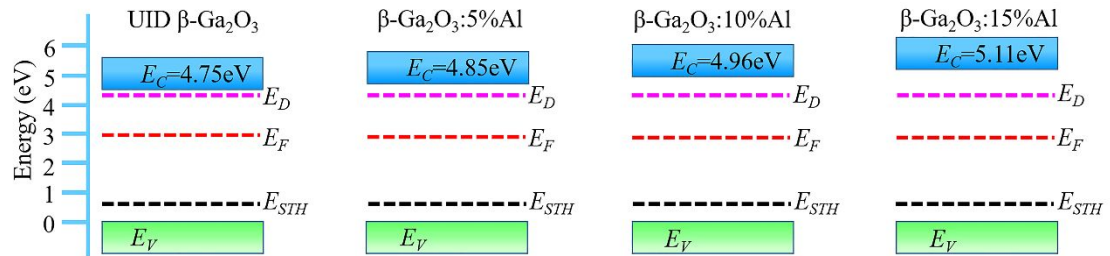

**Figure S4.** Energy band diagram of the UID  $\beta$ -Ga<sub>2</sub>O<sub>3</sub> and  $\beta$ -Ga<sub>2</sub>O<sub>3</sub>:Al crystals.

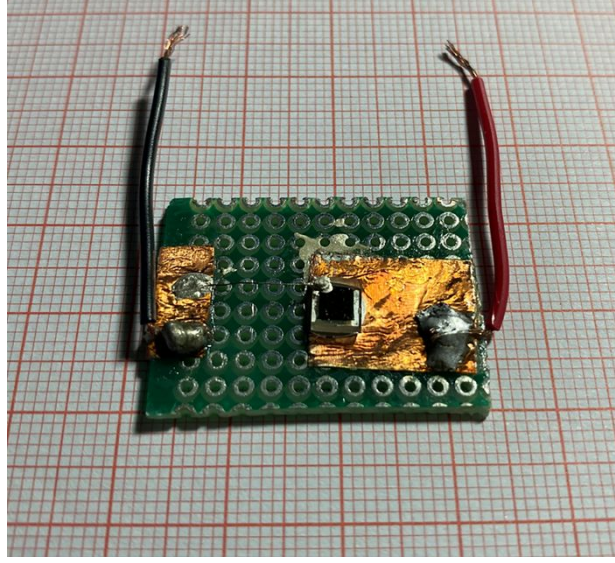

**Figure S5.** Photograph of the  $\beta$ -Ga<sub>2</sub>O<sub>3</sub>:15%Al-based X-ray detector.

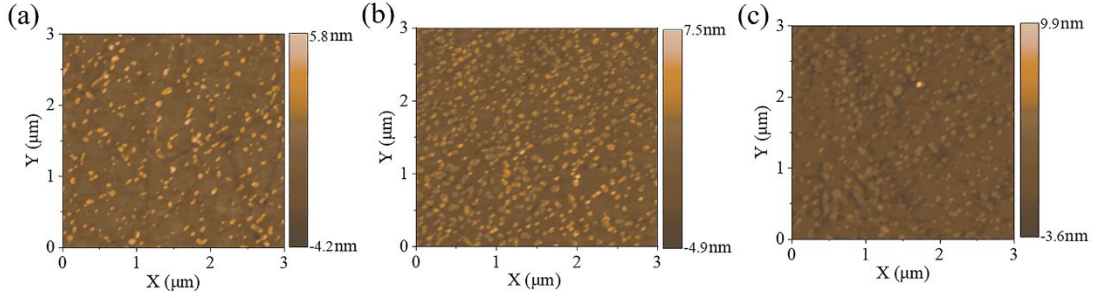

**Figure S6.** AFM images of the polished (a)  $\beta$ -Ga<sub>2</sub>O<sub>3</sub>:5%Al, (b)  $\beta$ -Ga<sub>2</sub>O<sub>3</sub>:10%Al and (c)  $\beta$ -Ga<sub>2</sub>O<sub>3</sub>:15%Al single crystals. The root-mean-square roughness of  $\beta$ -Ga<sub>2</sub>O<sub>3</sub>:5%Al,  $\beta$ -Ga<sub>2</sub>O<sub>3</sub>:10%Al, and  $\beta$ -Ga<sub>2</sub>O<sub>3</sub>:15%Al crystals are 1.21, 1.67 and 1.45 nm, respectively.

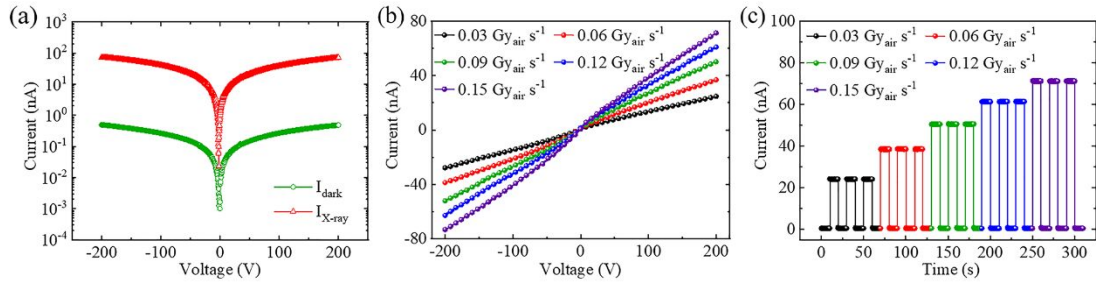

**Figure S7.** Performance of the  $\beta$ -Ga<sub>2</sub>O<sub>3</sub>:10%Al-based X-ray detector. (a)  $I$ - $V$  curves on a logarithmic scale of the detector in the dark and under X-ray irradiation. (b)  $I$ - $V$  curves of the detector under X-ray irradiation with different dose rates. (c) Current response characteristics of the detector at 200 V when exposed to the different dose rates.

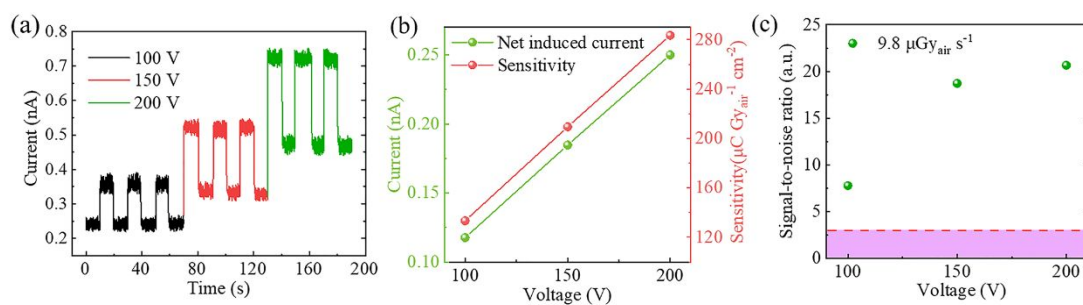

**Figure S8.** Performance of the  $\beta\text{-Ga}_2\text{O}_3\text{:10\%Al}$ -based X-ray detector under an X-ray dose rate of  $9.8 \mu\text{Gy}_{\text{air}} \text{ s}^{-1}$ . (a) Current response of the detector at different applied voltages. (b) Net induced current and sensitivity characteristics at different applied voltages. (c) SNR of the detector, where the red dashed line represents an SNR of 3.
